# Supplementary material for: Dwarf Pomegranate (Punica granatum L. var. nana): Source of 5-HMF and Bioactive Compounds with Applications in the Protection of Woody Crops
Source: MDPI journal article supplement (doi:10.3390/plants11040550), 2022-02-18
Supplement: s1 [file s1]

# Dwarf pomegranate (*Punica granatum* L. var. *nana*): source of 5-HMF and bioactive compounds with applications in the protection of woody crops

E. Sánchez-Hernández, L. Buzón-Durán, J.A. Cuchí-Oterino, J. Martín-Gil, B. Lorenzo-Vidal and P. Martín-Ramos

## SUPPLEMENTARY MATERIALS

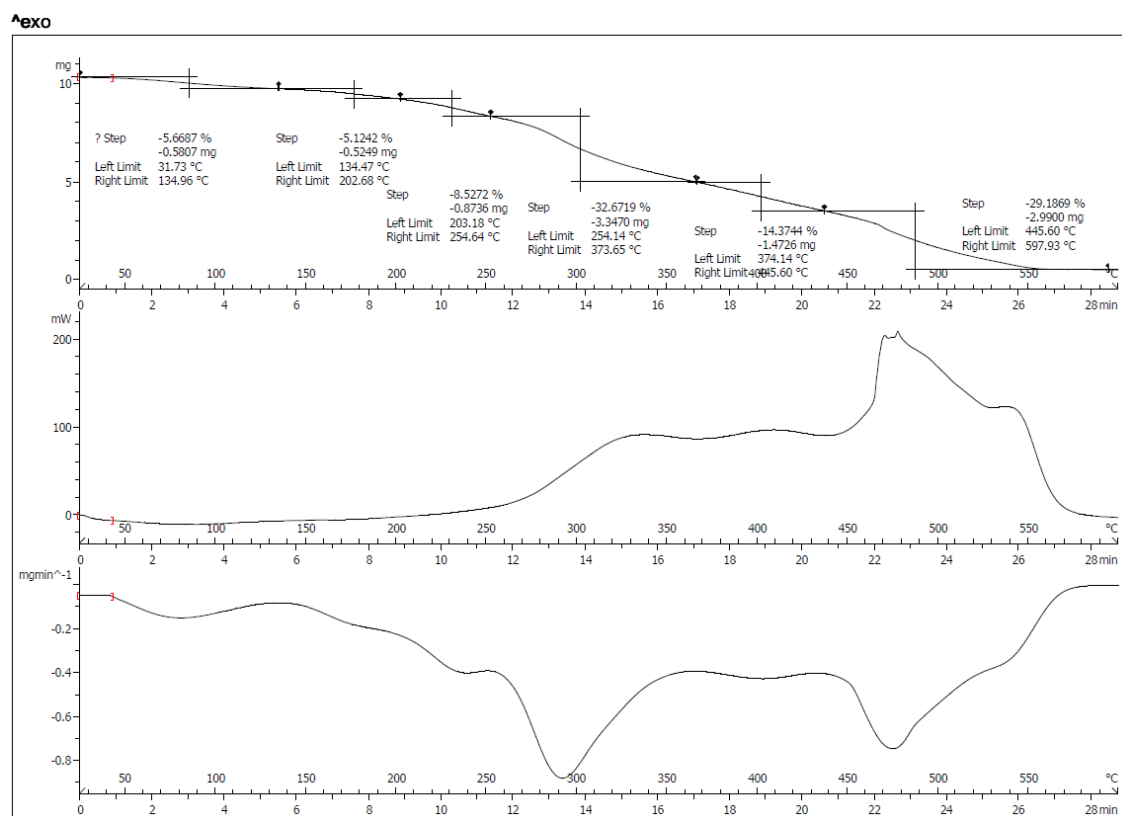

Figure S1. TG, DSC, and DTG curves for *P. granatum* var. *nana* fruits.

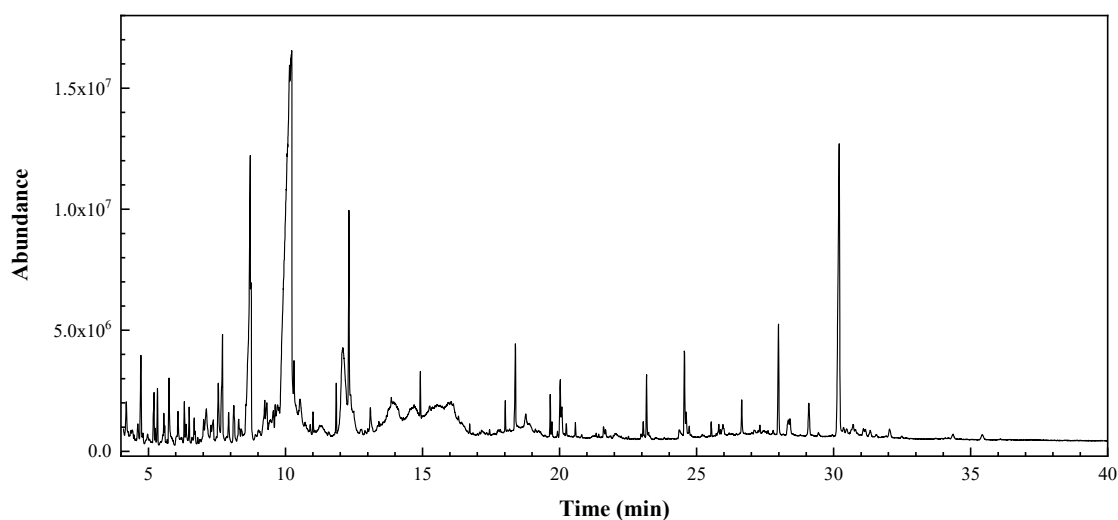

Figure S2. GC-MS chromatogram of *P. granatum* var. *nana* hydromethanolic fruit extract.

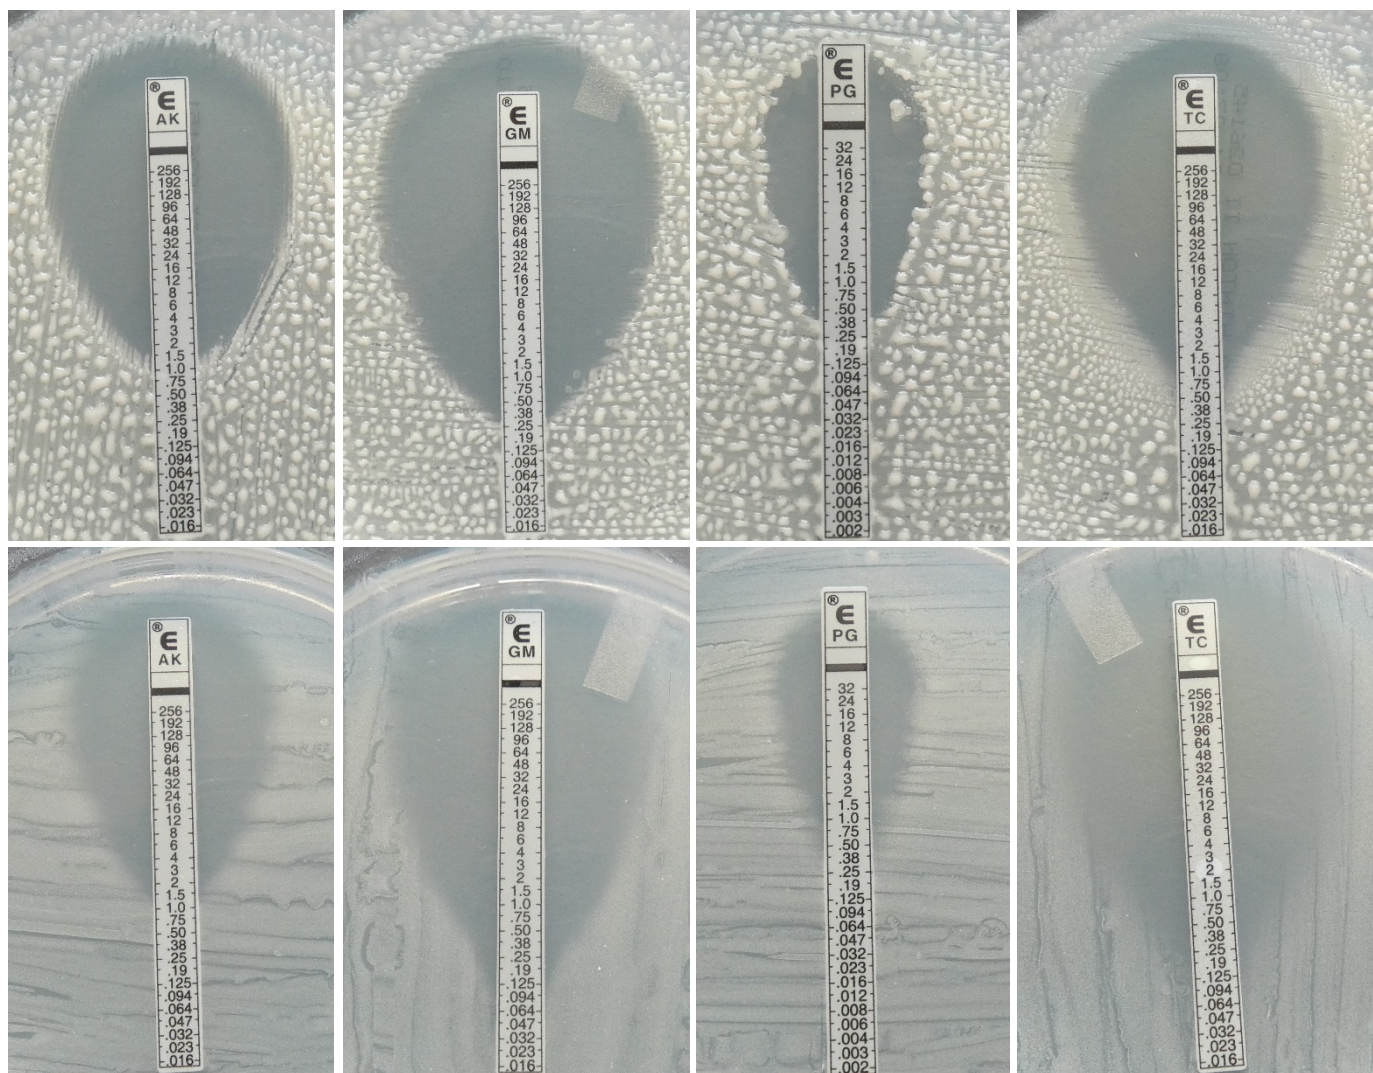

**Figure S3.** Determination of minimum inhibitory concentrations of conventional antibiotics against *Erwinia amylovora* (top row) and *Erwinia vitivora* (bottom row) using ETEST® gradient MIC strips. From left to right: AK = amikacin, GM = gentamicin, PG = benzylpenicillin, TC = tetracycline.

**Table S1.** Minimum inhibitory concentrations of conventional antibiotics against *Erwinia amylovora* and *E. vitivora* (expressed in  $\mu\text{g}\cdot\text{mL}^{-1}$ ).

| Bacteria                 | AK  | GM   | PG  | TC  |
|--------------------------|-----|------|-----|-----|
| <i>Erwinia amylovora</i> | 1.5 | 0.38 | 0.5 | 1.0 |
| <i>Erwinia vitivora</i>  | 1.5 | 0.19 | 2.0 | 0.5 |

AK = amikacin, GM = gentamicin, PG = benzylpenicillin, TC = tetracycline

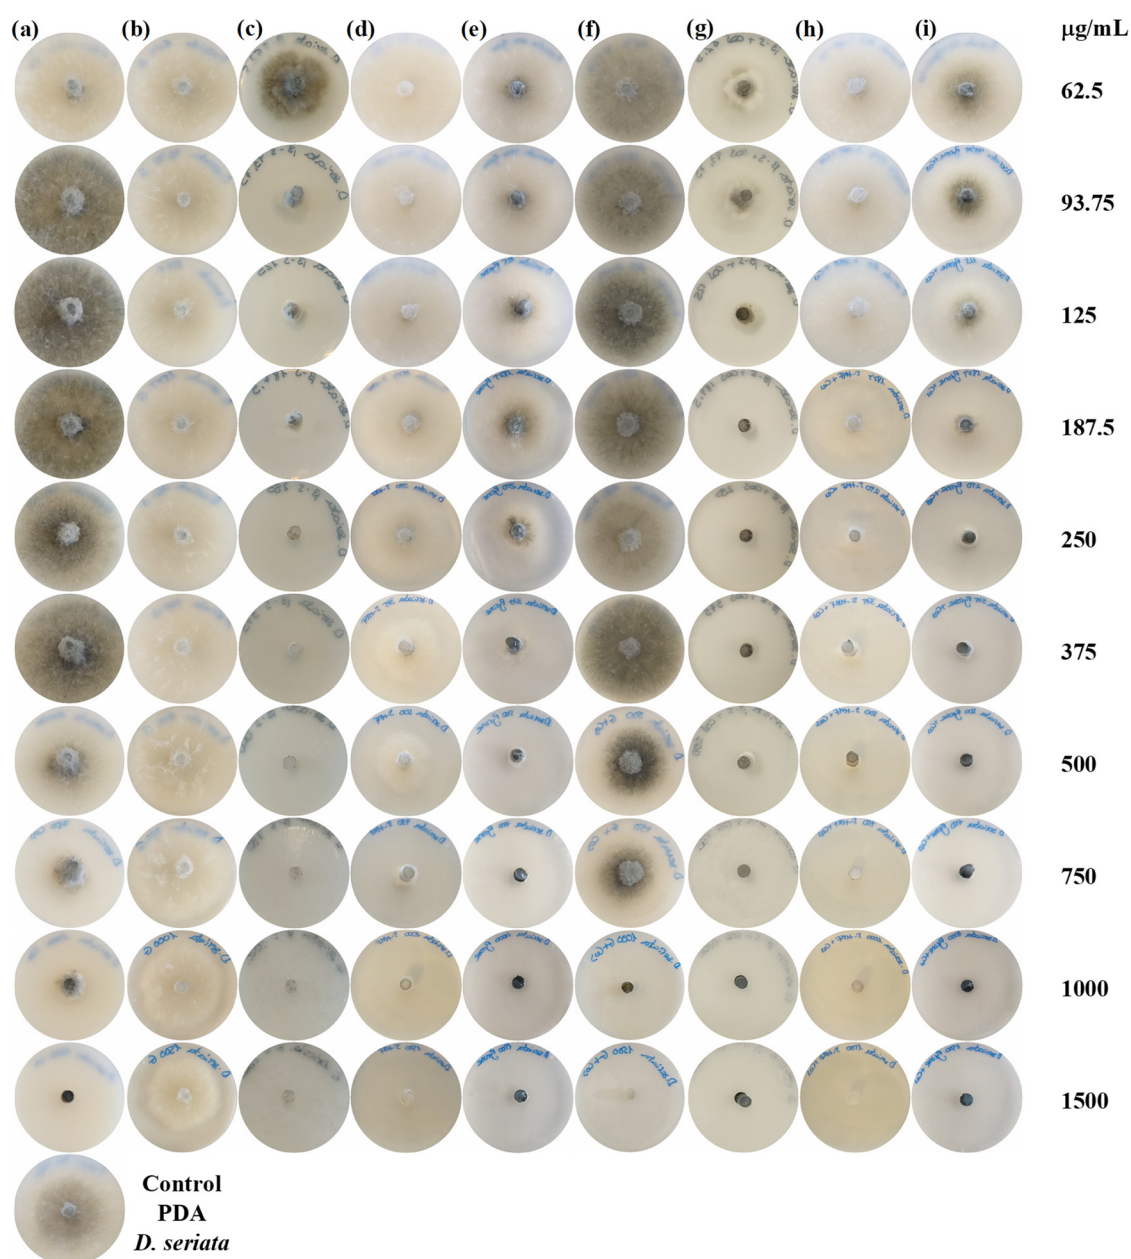

**Figure S4.** Mycelial growth inhibition of *D. seriata* upon treatment at different concentrations with (a) chitosan oligomers, COS; (b) *P. granatum* var. *nana* fruits hydromethanolic extract; (c)  $\beta$ -sitosterol; (d) 5-HMF; (e) DDPM; (f) COS-*P. granatum* conjugate complex; (g) COS- $\beta$ -sitosterol conjugate complex; (h) COS-5-HMF conjugate complex; and (i) COS-DDPM conjugate complex. Only one replicate is shown. The control (PDA-only medium, without any amendments) is shown in the bottom left corner.
